# Supplementary material
Source: PubMed Central journal article supplement (PMC10071998)
Supplement: NIHMS1882774-supplement-Supplementary_material.pdf [file NIHMS1882774-supplement-Supplementary_material.pdf]

# Supplementary Materials for “Covariate-adjusted continuous biomarker assessment among subpopulations”

Ziyi Li<sup>1</sup>, Yijian Huang<sup>2,\*</sup>, Dattatraya Patil<sup>3</sup>, Mark Rubin<sup>4</sup> and Martin G. Sanda<sup>3</sup>

<sup>1</sup> *Department of Biostatistics, The University of Texas MD Anderson Cancer Center, Houston, Texas, U.S.A.*

<sup>2</sup> *Department of Biostatistics and Bioinformatics, Emory University, Atlanta, Georgia, U.S.A.*

<sup>3</sup> *Department of Urology, Emory University, Atlanta, Georgia, U.S.A.*

<sup>4</sup> *Department for BioMedical Research, Bern Center for Precision Medicine, University of Bern, Bern, Switzerland.*

October 14, 2022

Table S1: Estimation and inference results under the first simulation setting. Specificity  $\phi_0(\mathbf{z})$  under controlled sensitivity level  $\rho_0$  at the covariate selection  $\mathbf{z} = (0.25, 0.75)^T$  by our proposed method and two existing methods (Pepe, 1998; Faraggi, 2003) are estimated and presented.

| $n_1 = n_0$     | Proposed method |      |      |      | Pepe (1998) |      |      |      | Faraggi (2003) |      |     |      |
|-----------------|-----------------|------|------|------|-------------|------|------|------|----------------|------|-----|------|
|                 | Bias            | SD   | SE   | Cov  | Bias        | SD   | SE   | LCov | Bias           | SD   | SE  | Cov  |
| $\rho_0 = 0.95$ |                 |      |      |      |             |      |      |      |                |      |     |      |
| 100             | 252             | 1450 | 1530 | 95.7 | 302         | 1100 | 1050 | 93.0 | 1140           | 1050 | 959 | 73.7 |
| 200             | 155             | 1040 | 1080 | 95.1 | 119         | 749  | 728  | 93.5 | 1130           | 761  | 703 | 60.9 |
| 500             | 42              | 650  | 675  | 95.2 | -24         | 466  | 449  | 94.1 | 1090           | 486  | 457 | 33.0 |
| 1000            | 20              | 453  | 471  | 95.0 | -66         | 322  | 314  | 93.6 | 1090           | 342  | 325 | 9.5  |
| 5000            | 3               | 201  | 206  | 94.7 | -95         | 143  | 139  | 88.8 | 1090           | 150  | 147 | 0.0  |
| $\rho_0 = 0.90$ |                 |      |      |      |             |      |      |      |                |      |     |      |
| 100             | 165             | 1540 | 1600 | 97.5 | 281         | 1220 | 1140 | 93.0 | 900            | 1000 | 930 | 79.0 |
| 200             | 94              | 1090 | 1140 | 95.9 | 135         | 876  | 827  | 93.0 | 907            | 720  | 675 | 70.0 |
| 500             | 23              | 690  | 716  | 95.2 | 18          | 553  | 526  | 93.4 | 884            | 462  | 436 | 47.6 |
| 1000            | 8               | 483  | 501  | 94.9 | -15         | 390  | 371  | 93.6 | 886            | 325  | 309 | 21.2 |
| 5000            | 5               | 215  | 221  | 95.2 | -42         | 170  | 166  | 93.5 | 888            | 142  | 139 | 0.0  |
| $\rho_0 = 0.85$ |                 |      |      |      |             |      |      |      |                |      |     |      |
| 100             | 92              | 1500 | 1560 | 98.0 | 253         | 1240 | 1130 | 93.0 | 541            | 921  | 860 | 85.0 |
| 200             | 55              | 1060 | 1110 | 96.5 | 158         | 901  | 838  | 92.7 | 553            | 655  | 619 | 80.6 |
| 500             | 3               | 682  | 704  | 94.7 | 64          | 582  | 547  | 93.3 | 539            | 420  | 398 | 70.0 |
| 1000            | 2               | 478  | 496  | 94.9 | 38          | 410  | 390  | 93.5 | 542            | 295  | 281 | 51.3 |
| 5000            | 2               | 211  | 219  | 95.6 | 20          | 180  | 175  | 93.8 | 546            | 129  | 126 | 1.7  |
| $\rho_0 = 0.80$ |                 |      |      |      |             |      |      |      |                |      |     |      |
| 100             | 29              | 1400 | 1460 | 98.2 | 213         | 1160 | 1050 | 93.2 | 169            | 834  | 782 | 90.6 |
| 200             | 19              | 989  | 1040 | 96.5 | 143         | 859  | 793  | 93.0 | 185            | 588  | 559 | 90.0 |
| 500             | -6              | 636  | 659  | 95.3 | 82          | 559  | 525  | 93.2 | 176            | 378  | 358 | 88.2 |
| 1000            | -10             | 452  | 464  | 95.0 | 68          | 394  | 375  | 93.2 | 180            | 266  | 253 | 86.1 |
| 5000            | 3               | 200  | 206  | 95.4 | 60          | 174  | 170  | 92.4 | 184            | 116  | 114 | 62.3 |

Bias,  $(\hat{\phi} - \phi_0) \times 10^4$ ; SD, standard deviation  $\times 10^4$ ; SE, standard error estimated using bootstrap-based variance estimation  $\times 10^4$ ; Cov (%), coverage rates of 95% confidence interval.

Table S2: Estimation and inference results under the first simulation setting. Specificity  $\phi_0(\mathbf{z})$  under controlled sensitivity level  $\rho_0$  at the covariate selection  $\mathbf{z} = (0.75, 0.25)^T$  by our proposed method and two existing methods (Pepe, 1998; Faraggi, 2003) are estimated and presented.

| $n_1 = n_0$     | Proposed method |      |      |      | Pepe (1998) |      |      |      | Faraggi (2003) |      |     |      |
|-----------------|-----------------|------|------|------|-------------|------|------|------|----------------|------|-----|------|
|                 | Bias            | SD   | SE   | Cov  | Bias        | SD   | SE   | LCov | Bias           | SD   | SE  | Cov  |
| $\rho_0 = 0.95$ |                 |      |      |      |             |      |      |      |                |      |     |      |
| 100             | 326             | 1650 | 1660 | 94.4 | 1210        | 1210 | 1140 | 91.2 | 1090           | 1090 | 976 | 66.2 |
| 200             | 172             | 1170 | 1200 | 94.9 | 833         | 833  | 803  | 92.4 | 774            | 774  | 716 | 49.4 |
| 500             | 80              | 732  | 759  | 94.9 | 514         | 514  | 502  | 92.8 | 491            | 491  | 465 | 18.0 |
| 1000            | 32              | 519  | 532  | 94.7 | 363         | 363  | 351  | 93.1 | 349            | 349  | 331 | 2.4  |
| 5000            | 7               | 229  | 232  | 94.6 | 162         | 162  | 156  | 91.5 | 157            | 157  | 149 | 0.0  |
| $\rho_0 = 0.90$ |                 |      |      |      |             |      |      |      |                |      |     |      |
| 100             | 144             | 1670 | 1690 | 97.3 | 1310        | 1310 | 1180 | 92.3 | 1000           | 1000 | 910 | 78.6 |
| 200             | 75              | 1190 | 1240 | 96.2 | 919         | 919  | 870  | 93.8 | 706            | 706  | 660 | 70.6 |
| 500             | 46              | 769  | 791  | 95.2 | 588         | 588  | 564  | 93.9 | 448            | 448  | 426 | 48.9 |
| 1000            | 20              | 548  | 561  | 94.5 | 418         | 418  | 399  | 93.6 | 319            | 319  | 302 | 23.4 |
| 5000            | 3               | 243  | 248  | 95.0 | 184         | 184  | 179  | 94.0 | 142            | 142  | 136 | 0.0  |
| $\rho_0 = 0.85$ |                 |      |      |      |             |      |      |      |                |      |     |      |
| 100             | -12             | 1540 | 1570 | 98.0 | 1260        | 1260 | 1110 | 93.5 | 898            | 898  | 820 | 88.9 |
| 200             | 21              | 1100 | 1140 | 96.3 | 899         | 899  | 838  | 93.8 | 626            | 626  | 590 | 88.3 |
| 500             | 14              | 698  | 728  | 95.4 | 575         | 575  | 553  | 93.9 | 398            | 398  | 378 | 85.2 |
| 1000            | 6               | 509  | 519  | 94.8 | 420         | 420  | 397  | 93.2 | 284            | 284  | 268 | 79.3 |
| 5000            | 0               | 224  | 230  | 94.8 | 187         | 187  | 179  | 91.5 | 126            | 126  | 120 | 38.0 |
| $\rho_0 = 0.80$ |                 |      |      |      |             |      |      |      |                |      |     |      |
| 100             | -74             | 1340 | 1390 | 97.5 | 1130        | 1130 | 993  | 93.4 | 797            | 797  | 730 | 92.2 |
| 200             | -28             | 945  | 986  | 96.3 | 814         | 814  | 751  | 94.0 | 551            | 551  | 522 | 92.5 |
| 500             | -14             | 599  | 623  | 95.5 | 524         | 524  | 499  | 93.3 | 351            | 351  | 333 | 90.6 |
| 1000            | -1              | 438  | 440  | 93.9 | 385         | 385  | 359  | 92.3 | 251            | 251  | 236 | 85.2 |
| 5000            | -2              | 192  | 196  | 94.7 | 170         | 170  | 163  | 88.0 | 111            | 111  | 106 | 55.6 |

Bias,  $(\hat{\phi} - \phi_0) \times 10^4$ ; SD, standard deviation  $\times 10^4$ ; SE, standard error estimated using bootstrap-based variance estimation  $\times 10^4$ ; Cov (%), coverage rates of 95% confidence interval.

Table S3: Estimation and inference results under the second simulation setting. Specificity  $\phi_0(\mathbf{z})$  under controlled sensitivity level  $\rho_0$  at the covariate selection  $\mathbf{z} = (0.25, 0.75)^T$  by our proposed method and two existing methods (Pepe, 1998; Faraggi, 2003) are estimated and presented.

| $n_1 = n_0$     | Proposed method |      |      |      | Pepe (1998) |      |      |      | Faraggi (2003) |      |      |      |
|-----------------|-----------------|------|------|------|-------------|------|------|------|----------------|------|------|------|
|                 | Bias            | SD   | SE   | Cov  | Bias        | SD   | SE   | LCov | Bias           | SD   | SE   | Cov  |
| $\rho_0 = 0.95$ |                 |      |      |      |             |      |      |      |                |      |      |      |
| 100             | 535             | 1870 | 1920 | 91.6 | 638         | 1440 | 1300 | 92.0 | 232            | 1130 | 1040 | 92.3 |
| 200             | 292             | 1330 | 1360 | 91.4 | 339         | 998  | 934  | 92.9 | 127            | 793  | 746  | 92.8 |
| 500             | 68              | 797  | 845  | 90.9 | 125         | 609  | 583  | 94.0 | 41             | 489  | 470  | 93.1 |
| 1000            | -1              | 564  | 589  | 92.1 | 65          | 426  | 411  | 93.7 | 18             | 346  | 332  | 93.4 |
| 5000            | -61             | 252  | 258  | 90.8 | 12          | 189  | 184  | 93.8 | 4              | 153  | 149  | 93.4 |
| $\rho_0 = 0.90$ |                 |      |      |      |             |      |      |      |                |      |      |      |
| 100             | 246             | 2100 | 2080 | 91.8 | 416         | 1670 | 1470 | 93.0 | 102            | 1480 | 1310 | 92.0 |
| 200             | 112             | 1580 | 1560 | 91.8 | 232         | 1210 | 1110 | 93.1 | 65             | 1070 | 983  | 92.6 |
| 500             | 14              | 996  | 1040 | 91.2 | 76          | 776  | 741  | 94.0 | 13             | 680  | 646  | 93.3 |
| 1000            | -31             | 730  | 739  | 92.0 | 34          | 561  | 530  | 93.4 | 2              | 485  | 463  | 93.1 |
| 5000            | -38             | 327  | 331  | 92.3 | 9           | 251  | 240  | 93.7 | 1              | 217  | 209  | 93.5 |
| $\rho_0 = 0.85$ |                 |      |      |      |             |      |      |      |                |      |      |      |
| 100             | 10              | 1930 | 1920 | 91.2 | 186         | 1540 | 1350 | 92.8 | -29            | 1410 | 1230 | 92.2 |
| 200             | 2               | 1440 | 1430 | 92.3 | 110         | 1120 | 1030 | 93.3 | -2             | 1020 | 930  | 92.6 |
| 500             | 14              | 907  | 935  | 92.6 | 37          | 723  | 685  | 93.9 | -14            | 648  | 613  | 93.2 |
| 1000            | 1               | 658  | 669  | 92.5 | 10          | 518  | 495  | 93.9 | -12            | 461  | 440  | 93.1 |
| 5000            | 20              | 293  | 297  | 93.0 | 2           | 232  | 223  | 93.7 | -1             | 206  | 199  | 93.2 |
| $\rho_0 = 0.80$ |                 |      |      |      |             |      |      |      |                |      |      |      |
| 100             | -105            | 1580 | 1640 | 93.3 | 48          | 1270 | 1140 | 93.2 | -104           | 1190 | 1040 | 92.5 |
| 200             | -45             | 1150 | 1180 | 92.6 | 36          | 928  | 851  | 94.1 | -42            | 843  | 771  | 92.7 |
| 500             | 12              | 709  | 741  | 92.6 | 2           | 587  | 559  | 94.1 | -27            | 535  | 505  | 93.0 |
| 1000            | 30              | 500  | 523  | 92.4 | -4          | 419  | 402  | 93.6 | -18            | 379  | 361  | 93.0 |
| 5000            | 46              | 224  | 230  | 91.3 | 1           | 187  | 181  | 93.4 | -2             | 169  | 162  | 93.0 |

Bias,  $(\hat{\phi} - \phi_0) \times 10^4$ ; SD, standard deviation  $\times 10^4$ ; SE, standard error estimated using bootstrap-based variance estimation  $\times 10^4$ ; Cov (%), coverage rates of 95% confidence interval.

Table S4: Estimation and inference results under the second simulation setting. Specificity  $\phi_0(\mathbf{z})$  under controlled sensitivity level  $\rho_0$  at the covariate selection  $\mathbf{z} = (0.75, 0.25)^T$  by our proposed method and two existing methods (Pepe, 1998; Faraggi, 2003) are estimated and presented.

| $n_1 = n_0$     | Proposed method |      |      |      | Pepe (1998) |      |      |      | Faraggi (2003) |      |      |      |
|-----------------|-----------------|------|------|------|-------------|------|------|------|----------------|------|------|------|
|                 | Bias            | SD   | SE   | Cov  | Bias        | SD   | SE   | LCov | Bias           | SD   | SE   | Cov  |
| $\rho_0 = 0.95$ |                 |      |      |      |             |      |      |      |                |      |      |      |
| 100             | 463             | 1300 | 1390 | 89.8 | 992         | 992  | 914  | 93.1 | 733            | 733  | 679  | 91.4 |
| 200             | 217             | 822  | 895  | 92.9 | 621         | 621  | 603  | 94.0 | 476            | 476  | 456  | 92.8 |
| 500             | 75              | 471  | 503  | 94.4 | 362         | 362  | 349  | 94.1 | 286            | 286  | 273  | 93.2 |
| 1000            | 39              | 317  | 339  | 95.3 | 245         | 245  | 241  | 94.2 | 198            | 198  | 191  | 93.1 |
| 5000            | -8              | 140  | 142  | 94.7 | 109         | 109  | 104  | 93.5 | 89             | 88.6 | 83.8 | 92.7 |
| $\rho_0 = 0.90$ |                 |      |      |      |             |      |      |      |                |      |      |      |
| 100             | 315             | 1790 | 1790 | 95.8 | 1460        | 1460 | 1280 | 92.8 | 1250           | 1250 | 1100 | 91.8 |
| 200             | 146             | 1270 | 1300 | 95.5 | 1010        | 1010 | 941  | 93.7 | 876            | 876  | 812  | 92.7 |
| 500             | 11              | 805  | 825  | 95.7 | 643         | 643  | 603  | 93.6 | 553            | 553  | 522  | 93.3 |
| 1000            | 0               | 569  | 584  | 95.3 | 446         | 446  | 431  | 93.9 | 391            | 391  | 373  | 93.2 |
| 5000            | -44             | 256  | 258  | 94.6 | 202         | 202  | 192  | 93.4 | 178            | 178  | 168  | 92.7 |
| $\rho_0 = 0.85$ |                 |      |      |      |             |      |      |      |                |      |      |      |
| 100             | 74              | 1960 | 1940 | 98.0 | 1610        | 1610 | 1400 | 92.9 | 1450           | 1450 | 1260 | 92.0 |
| 200             | 62              | 1440 | 1460 | 96.8 | 1160        | 1160 | 1060 | 93.4 | 1030           | 1030 | 949  | 92.6 |
| 500             | -3              | 926  | 945  | 95.1 | 740         | 740  | 699  | 94.0 | 659            | 659  | 621  | 93.4 |
| 1000            | 17              | 656  | 674  | 95.1 | 521         | 521  | 501  | 93.9 | 469            | 469  | 446  | 93.4 |
| 5000            | -14             | 302  | 301  | 93.9 | 241         | 241  | 226  | 92.9 | 214            | 214  | 202  | 92.7 |
| $\rho_0 = 0.80$ |                 |      |      |      |             |      |      |      |                |      |      |      |
| 100             | -76             | 1920 | 1910 | 98.7 | 1550        | 1550 | 1360 | 93.0 | 1430           | 1430 | 1240 | 92.1 |
| 200             | 26              | 1390 | 1410 | 97.0 | 1130        | 1130 | 1030 | 93.3 | 1020           | 1020 | 934  | 92.6 |
| 500             | 11              | 878  | 914  | 95.5 | 722         | 722  | 680  | 93.6 | 648            | 648  | 612  | 93.5 |
| 1000            | 46              | 631  | 647  | 94.6 | 507         | 507  | 488  | 94.0 | 462            | 462  | 439  | 93.5 |
| 5000            | 39              | 289  | 288  | 93.6 | 233         | 233  | 221  | 93.5 | 211            | 211  | 199  | 92.8 |

Bias,  $(\hat{\phi} - \phi_0) \times 10^4$ ; SD, standard deviation  $\times 10^4$ ; SE, standard error estimated using bootstrap-based variance estimation  $\times 10^4$ ; Cov (%), coverage rates of 95% confidence interval.

Table S5: Estimation and inference results under the first simulation setting. Specificity  $\phi_0(\mathbf{z})$  under controlled sensitivity level  $\rho_0$  at the covariate selection  $\mathbf{z} = (0.50, 0.50)^T$  by our proposed method and an existing Bayesian method (Inácio de Carvalho et al. 2013) are estimated and presented. Results were summarized over 100 Monte Carlo iterations.

| $n_1 = n_0$     | Proposed method |      |      |                    |                    | Inácio de Carvalho et al. (2013) |      |      |                    |                    |
|-----------------|-----------------|------|------|--------------------|--------------------|----------------------------------|------|------|--------------------|--------------------|
|                 | Bias (SD)       | SE   | Cov  | Time <sub>CI</sub> | Time <sub>CB</sub> | Bias (SD)                        | SE   | Cov  | Time <sub>CI</sub> | Time <sub>CB</sub> |
| $\rho_0 = 0.95$ |                 |      |      |                    |                    |                                  |      |      |                    |                    |
| 100             | 214.3 (1470)    | 1170 | 96.2 | 0.385              | 27                 | 854.0 (1100)                     | 1050 | 90.8 | 24.4               | 221                |
| 200             | 40.2 (984)      | 767  | 97.8 | 0.425              | 79                 | 505.5 (790)                      | 739  | 92.4 | 28.8               | 226                |
| 500             | 2.5 (683)       | 465  | 95.8 | 0.527              | 264                | 234.6 (559)                      | 456  | 94.0 | 42.0               | 242                |
| 1000            | 14.4 (478)      | 325  | 95.6 | 0.785              | 743                | 138.9 (400)                      | 325  | 95.4 | 62.3               | 267                |
| 5000            | 12.2 (203)      | 140  | 95.2 | 3.070              | 11453              | 72.1 (176)                       | 147  | 95.4 | 228.8              | 460                |
| $\rho_0 = 0.90$ |                 |      |      |                    |                    |                                  |      |      |                    |                    |
| 100             | 202.0 (1500)    | 1190 | 96.6 | 0.383              | 30                 | 774.2 (1200)                     | 1020 | 89.0 | 24.2               | 220                |
| 200             | 14.1 (1020)     | 806  | 97.6 | 0.419              | 87                 | 438.0 (870)                      | 742  | 92.0 | 28.6               | 227                |
| 500             | 7.3 (693)       | 492  | 96.2 | 0.530              | 231                | 182.3 (603)                      | 477  | 95.2 | 41.7               | 242                |
| 1000            | 17.1 (501)      | 341  | 95.6 | 0.746              | 757                | 117.9 (450)                      | 341  | 95.2 | 61.3               | 266                |
| 5000            | 10.9 (218)      | 149  | 96.0 | 2.921              | 11898              | 40.7 (191)                       | 155  | 96.6 | 229.5              | 456                |
| $\rho_0 = 0.85$ |                 |      |      |                    |                    |                                  |      |      |                    |                    |
| 100             | 131.0 (1510)    | 1110 | 97.8 | 0.379              | 30                 | 593.4 (1160)                     | 901  | 90.8 | 23.9               | 220                |
| 200             | 15.4 (1010)     | 771  | 97.4 | 0.417              | 80                 | 328.1 (851)                      | 672  | 92.6 | 28.5               | 227                |
| 500             | 13.3 (656)      | 474  | 96.4 | 0.535              | 232                | 138.1 (591)                      | 445  | 94.8 | 41.3               | 243                |
| 1000            | 10.6 (519)      | 330  | 96.4 | 0.754              | 700                | 100.0 (461)                      | 320  | 95.6 | 61.8               | 265                |
| 5000            | 10.7 (214)      | 145  | 95.0 | 3.020              | 11298              | 26.7 (190)                       | 148  | 96.2 | 228.4              | 460                |
| $\rho_0 = 0.80$ |                 |      |      |                    |                    |                                  |      |      |                    |                    |
| 100             | 100.0 (1470)    | 989  | 98.2 | 0.383              | 31                 | 379.2 (1070)                     | 763  | 90.8 | 24.1               | 221                |
| 200             | 4.2 (1000)      | 691  | 97.0 | 0.422              | 87                 | 198.1 (782)                      | 577  | 94.4 | 28.3               | 227                |
| 500             | -3.6 (651)      | 425  | 95.2 | 0.545              | 269                | 83.6 (540)                       | 388  | 95.0 | 40.7               | 241                |
| 1000            | 17.8 (506)      | 299  | 95.8 | 0.773              | 736                | 64.7 (430)                       | 279  | 95.4 | 61.5               | 264                |
| 5000            | 8.6 (198)       | 130  | 95.6 | 3.030              | 11791              | 15.4 (178)                       | 131  | 96.4 | 227.6              | 456                |

Bias,  $(\hat{\phi} - \phi_0) \times 10^4$ ; SD, standard deviation  $\times 10^4$ ; SE, standard error estimated using bootstrap-based variance estimation  $\times 10^4$ ; Cov (%), coverage rates of 95% confidence interval; Time<sub>CI</sub>, the averaged computational time of each iteration with second as the unit for confidence interval construction; Time<sub>CB</sub>, the averaged computational time of each iteration with second as the unit for confidence band construction.

Table S6: Estimation and inference results under the first simulation setting. Specificity  $\phi_0(\mathbf{z})$  under controlled sensitivity level  $\rho_0$  at the covariate selection  $\mathbf{z} = (0.25, 0.25)^T$  and  $\mathbf{z} = (0.25, 0.75)^T$  by our proposed method and an existing Bayesian method (Inácio de Carvalho et al. 2013) are estimated and presented. Results were summarized over 100 Monte Carlo iterations.

| $n_1 = n_0$     | $\mathbf{z} = (0.25, 0.25)^T$ |      |      |                    |      |      | $\mathbf{z} = (0.25, 0.75)^T$ |      |      |                    |      |      |
|-----------------|-------------------------------|------|------|--------------------|------|------|-------------------------------|------|------|--------------------|------|------|
|                 | Proposal                      |      |      | Inácio de Carvalho |      |      | Proposal                      |      |      | Inácio de Carvalho |      |      |
|                 | Bias (SD)                     | SE   | Cov  | Bias (SD)          | SE   | Cov  | Bias (SD)                     | SE   | Cov  | Bias (SD)          | SE   | Cov  |
| $\rho_0 = 0.95$ |                               |      |      |                    |      |      |                               |      |      |                    |      |      |
| 100             | 370(1532)                     | 1473 | 0.94 | 270(1070)          | 1131 | 0.94 | 160(1486)                     | 1471 | 0.97 | 230(1137)          | 1149 | 0.98 |
| 200             | 180(1048)                     | 1055 | 0.95 | 100(779)           | 842  | 0.99 | 130(1016)                     | 1034 | 0.95 | 190(770)           | 856  | 0.98 |
| 500             | 100(543)                      | 654  | 0.97 | -13(488)           | 542  | 0.95 | -59(606)                      | 639  | 0.98 | -1(485)            | 549  | 0.99 |
| 1000            | -11(426)                      | 467  | 0.98 | -67(361)           | 390  | 0.96 | 60(438)                       | 483  | 0.96 | 19(335)            | 407  | 0.98 |
| 5000            | -11(191)                      | 203  | 0.97 | -6(166)            | 184  | 0.97 | -1(202)                       | 204  | 0.97 | 15(171)            | 187  | 0.96 |
| $\rho_0 = 0.90$ |                               |      |      |                    |      |      |                               |      |      |                    |      |      |
| 100             | 260(1585)                     | 1505 | 0.94 | 110(1194)          | 1196 | 0.92 | -92(1610)                     | 1574 | 0.97 | 120(1225)          | 1256 | 0.95 |
| 200             | 200(1081)                     | 1064 | 0.94 | 3(868)             | 891  | 0.98 | 98(1052)                      | 1137 | 0.96 | 140(824)           | 938  | 0.96 |
| 500             | 46(686)                       | 681  | 0.96 | -91(546)           | 584  | 0.96 | -85(631)                      | 723  | 0.99 | -36(532)           | 618  | 0.98 |
| 1000            | 1(476)                        | 487  | 0.97 | -140(409)          | 417  | 0.95 | 1(494)                        | 492  | 0.95 | 3(401)             | 441  | 0.97 |
| 5000            | -1(205)                       | 214  | 0.92 | -60(174)           | 192  | 0.97 | -4(219)                       | 225  | 0.97 | -4(188)            | 200  | 0.95 |
| $\rho_0 = 0.85$ |                               |      |      |                    |      |      |                               |      |      |                    |      |      |
| 100             | 140(1467)                     | 1468 | 0.98 | -21(1184)          | 1156 | 0.92 | -210(1403)                    | 1578 | 0.98 | 21(1163)           | 1227 | 0.95 |
| 200             | 21(990)                       | 1035 | 0.97 | -43(859)           | 870  | 0.94 | -69(1067)                     | 1126 | 0.95 | 120(806)           | 912  | 0.97 |
| 500             | -37(633)                      | 684  | 0.98 | -100(561)          | 582  | 0.95 | -76(575)                      | 724  | 0.98 | -13(518)           | 618  | 0.98 |
| 1000            | -29(496)                      | 472  | 0.95 | -130(430)          | 417  | 0.91 | -13(505)                      | 480  | 0.93 | 18(427)            | 439  | 0.97 |
| 5000            | -12(209)                      | 211  | 0.95 | -68(179)           | 189  | 0.95 | -6(212)                       | 219  | 0.96 | 13(183)            | 200  | 0.99 |
| $\rho_0 = 0.80$ |                               |      |      |                    |      |      |                               |      |      |                    |      |      |
| 100             | 21(1458)                      | 1386 | 0.97 | -130(1109)         | 1079 | 0.92 | -190(1420)                    | 1524 | 0.97 | -94(1054)          | 1137 | 0.93 |
| 200             | -65(876)                      | 976  | 0.97 | -80(813)           | 808  | 0.95 | -130(1029)                    | 1056 | 0.95 | 55(750)            | 830  | 0.98 |
| 500             | 18(604)                       | 656  | 0.96 | -86(535)           | 548  | 0.96 | -55(587)                      | 677  | 0.98 | -5(468)            | 574  | 0.98 |
| 1000            | -25(456)                      | 444  | 0.91 | -110(420)          | 394  | 0.92 | -54(485)                      | 468  | 0.92 | 17(405)            | 406  | 0.97 |
| 5000            | 11(194)                       | 197  | 0.96 | -50(175)           | 179  | 0.95 | 4(182)                        | 207  | 0.96 | 26(164)            | 187  | 0.98 |

Bias,  $(\hat{\phi} - \phi_0) \times 10^4$ ; SD, standard deviation  $\times 10^4$ ; SE, standard error estimated using bootstrap-based variance estimation  $\times 10^4$ ; Cov (%), coverage rates of 95% confidence interval; Inácio de Carvalho: the method by Inácio de Carvalho et al. (2013).

Table S7: Estimation and inference results under the first simulation setting. Specificity  $\phi_0(\mathbf{z})$  under controlled sensitivity level  $\rho_0$  at the covariate selection  $\mathbf{z} = (0.75, 0.25)^T$  and  $\mathbf{z} = (0.75, 0.75)^T$  by our proposed method and an existing Bayesian method (Inácio de Carvalho et al. 2013) are estimated and presented. Results were summarized over 100 Monte Carlo iterations.

| $n_1 = n_0$     | $\mathbf{z} = (0.75, 0.25)^T$ |      |      |                    |      |      | $\mathbf{z} = (0.75, 0.75)^T$ |      |      |                    |      |      |
|-----------------|-------------------------------|------|------|--------------------|------|------|-------------------------------|------|------|--------------------|------|------|
|                 | Proposal                      |      |      | Inácio de Carvalho |      |      | Proposal                      |      |      | Inácio de Carvalho |      |      |
|                 | Bias (SD)                     | SE   | Cov  | Bias (SD)          | SE   | Cov  | Bias (SD)                     | SE   | Cov  | Bias (SD)          | SE   | Cov  |
| $\rho_0 = 0.95$ |                               |      |      |                    |      |      |                               |      |      |                    |      |      |
| 100             | 510(1694)                     | 1704 | 0.98 | 610(1236)          | 1337 | 0.94 | 220(1558)                     | 1712 | 0.98 | 610(1163)          | 1381 | 0.98 |
| 200             | 120(977)                      | 1189 | 0.97 | 420(884)           | 1018 | 0.97 | 82(1017)                      | 1217 | 0.97 | 490(928)           | 1048 | 0.96 |
| 500             | 130(714)                      | 720  | 0.96 | 150(639)           | 654  | 0.95 | -50(666)                      | 750  | 0.98 | 220(560)           | 673  | 0.97 |
| 1000            | -41(502)                      | 539  | 0.96 | 4(430)             | 468  | 0.97 | 31(506)                       | 523  | 0.96 | 130(450)           | 481  | 0.96 |
| 5000            | 49(243)                       | 234  | 0.93 | 55(198)            | 215  | 0.95 | 57(213)                       | 236  | 0.96 | 99(200)            | 222  | 0.96 |
| $\rho_0 = 0.90$ |                               |      |      |                    |      |      |                               |      |      |                    |      |      |
| 100             | 350(1582)                     | 1701 | 0.95 | 390(1288)          | 1379 | 0.96 | -24(1748)                     | 1724 | 0.95 | 470(1253)          | 1415 | 0.98 |
| 200             | 140(1100)                     | 1226 | 0.97 | 350(927)           | 1041 | 0.96 | 39(1189)                      | 1314 | 0.96 | 460(997)           | 1089 | 0.97 |
| 500             | 41(702)                       | 788  | 0.96 | 93(677)            | 692  | 0.95 | -90(660)                      | 818  | 0.99 | 190(620)           | 716  | 0.96 |
| 1000            | -21(574)                      | 560  | 0.93 | -16(483)           | 508  | 0.97 | -25(524)                      | 569  | 0.96 | 140(524)           | 516  | 0.92 |
| 5000            | 48(242)                       | 246  | 0.96 | 24(230)            | 229  | 0.96 | 44(250)                       | 258  | 0.95 | 120(250)           | 240  | 0.9  |
| $\rho_0 = 0.85$ |                               |      |      |                    |      |      |                               |      |      |                    |      |      |
| 100             | 160(1388)                     | 1558 | 0.97 | 150(1190)          | 1252 | 0.96 | -210(1623)                    | 1609 | 0.97 | 220(1152)          | 1270 | 0.98 |
| 200             | 160(1040)                     | 1155 | 0.97 | 220(852)           | 929  | 0.96 | 79(1012)                      | 1202 | 0.98 | 320(889)           | 958  | 0.97 |
| 500             | 20(632)                       | 735  | 0.99 | 20(608)            | 641  | 0.95 | -21(656)                      | 742  | 0.99 | 110(575)           | 652  | 0.96 |
| 1000            | -78(485)                      | 522  | 0.96 | -33(452)           | 470  | 0.97 | -67(556)                      | 534  | 0.96 | 99(485)            | 473  | 0.94 |
| 5000            | 38(231)                       | 229  | 0.94 | 7(232)             | 214  | 0.91 | 43(251)                       | 236  | 0.94 | 110(240)           | 221  | 0.9  |
| $\rho_0 = 0.80$ |                               |      |      |                    |      |      |                               |      |      |                    |      |      |
| 100             | -51(1382)                     | 1361 | 0.97 | -52(1033)          | 1072 | 0.95 | -250(1432)                    | 1429 | 0.95 | -24(975)           | 1072 | 0.98 |
| 200             | 110(930)                      | 993  | 0.98 | 69(731)            | 775  | 0.97 | 63(909)                       | 995  | 0.97 | 150(721)           | 780  | 0.97 |
| 500             | -51(592)                      | 635  | 0.98 | -43(490)           | 550  | 0.98 | -110(603)                     | 634  | 0.98 | 8(484)             | 546  | 0.97 |
| 1000            | -17(430)                      | 457  | 0.96 | -56(380)           | 400  | 0.97 | -45(458)                      | 461  | 0.96 | 29(395)            | 392  | 0.94 |
| 5000            | 27(198)                       | 194  | 0.96 | -6(207)            | 183  | 0.9  | 19(200)                       | 194  | 0.93 | 74(197)            | 183  | 0.9  |

Bias,  $(\hat{\phi} - \phi_0) \times 10^4$ ; SD, standard deviation  $\times 10^4$ ; SE, standard error estimated using bootstrap-based variance estimation  $\times 10^4$ ; Cov (%), coverage rates of 95% confidence interval; Inácio de Carvalho: the method by Inácio de Carvalho et al. (2013).



Table S8: Estimation and inference results under the second simulation setting. Specificity  $\phi_0(\mathbf{z})$  under controlled sensitivity level  $\rho_0$  at the covariate selection  $\mathbf{z} = (0.50, 0.50)^T$  by our proposed method and an existing Bayesian method (Inácio de Carvalho et al. 2013) are estimated and presented. Results were summarized over 100 Monte Carlo iterations.

| $n_1 = n_0$     | Proposed method |      |      |                    |                    | Inácio de Carvalho et al. (2013) |      |      |                    |                    |
|-----------------|-----------------|------|------|--------------------|--------------------|----------------------------------|------|------|--------------------|--------------------|
|                 | Bias (SD)       | SE   | Cov  | Time <sub>CI</sub> | Time <sub>CB</sub> | Bias (SD)                        | SE   | Cov  | Time <sub>CI</sub> | Time <sub>CB</sub> |
| $\rho_0 = 0.95$ |                 |      |      |                    |                    |                                  |      |      |                    |                    |
| 100             | 176.1 (1940)    | 1120 | 94.0 | 0.39               | 30                 | 477.0 (1090)                     | 888  | 97.2 | 24.3               | 216                |
| 200             | 29.0 (1270)     | 730  | 96.0 | 0.44               | 72                 | 248.8 (782)                      | 591  | 98.0 | 28.1               | 223                |
| 500             | 12.7 (821)      | 436  | 96.0 | 0.55               | 224                | 123.0 (516)                      | 353  | 96.6 | 40.7               | 235                |
| 1000            | -27.1 (572)     | 298  | 96.4 | 0.76               | 691                | 77.7 (375)                       | 243  | 96.8 | 61.8               | 263                |
| 5000            | -47.6 (258)     | 128  | 94.2 | 3.15               | 11439              | 44.2 (169)                       | 113  | 96.6 | 226.5              | 450                |
| $\rho_0 = 0.90$ |                 |      |      |                    |                    |                                  |      |      |                    |                    |
| 100             | 115.1 (2210)    | 1500 | 96.4 | 0.39               | 27                 | 507.0 (1400)                     | 1200 | 96.4 | 23.8               | 217                |
| 200             | 12.7 (1500)     | 1040 | 97.0 | 0.43               | 66                 | 288.3 (1030)                     | 839  | 96.8 | 28.1               | 223                |
| 500             | -4.7 (1070)     | 652  | 96.0 | 0.53               | 246                | 164.4 (711)                      | 520  | 95.2 | 40.6               | 238                |
| 1000            | -39.1 (749)     | 449  | 96.8 | 0.74               | 679                | 110.2 (513)                      | 364  | 96.8 | 60.7               | 260                |
| 5000            | -52.8 (330)     | 197  | 94.0 | 2.96               | 11702              | 76.7 (230)                       | 171  | 93.6 | 224.4              | 448                |
| $\rho_0 = 0.85$ |                 |      |      |                    |                    |                                  |      |      |                    |                    |
| 100             | 173.2 (1980)    | 1510 | 98.0 | 0.39               | 30                 | 413.0 (1340)                     | 1170 | 96.0 | 23.2               | 219                |
| 200             | 51.3 (1410)     | 1050 | 96.6 | 0.43               | 65                 | 250.8 (973)                      | 824  | 96.8 | 27.7               | 223                |
| 500             | 70.0 (938)      | 651  | 95.4 | 0.53               | 245                | 158.3 (671)                      | 516  | 94.2 | 40.4               | 237                |
| 1000            | 36.4 (657)      | 456  | 95.6 | 0.73               | 677                | 110.0 (479)                      | 364  | 96.2 | 60.0               | 259                |
| 5000            | 15.3 (291)      | 200  | 94.2 | 3.20               | 11622              | 84.1 (212)                       | 170  | 92.4 | 223.3              | 451                |
| $\rho_0 = 0.80$ |                 |      |      |                    |                    |                                  |      |      |                    |                    |
| 100             | 140.0 (1570)    | 1330 | 98.4 | 0.39               | 28                 | 296.2 (1130)                     | 989  | 94.6 | 23.0               | 217                |
| 200             | 87.2 (1140)     | 916  | 97.0 | 0.44               | 65                 | 191.0 (804)                      | 701  | 96.0 | 27.8               | 223                |
| 500             | 91.3 (750)      | 558  | 95.8 | 0.53               | 240                | 132.1 (548)                      | 442  | 94.4 | 39.5               | 235                |
| 1000            | 87.5 (517)      | 391  | 95.4 | 0.73               | 665                | 93.1 (387)                       | 313  | 96.2 | 60.1               | 261                |
| 5000            | 72.6 (219)      | 169  | 92.4 | 3.43               | 11292              | 75.5 (171)                       | 146  | 90.8 | 235.7              | 447                |

Bias,  $(\hat{\phi} - \phi_0) \times 10^4$ ; SD, standard deviation  $\times 10^4$ ; SE, standard error estimated using bootstrap-based variance estimation  $\times 10^4$ ; Cov (%), coverage rates of 95% confidence interval; Time<sub>CI</sub>, the averaged computational time of each iteration with second as the unit for confidence interval construction; Time<sub>CB</sub>, the averaged computational time of each iteration with second as the unit for confidence band construction.

Table S9: Estimation and inference results under the second simulation setting. Specificity  $\phi_0(\mathbf{z})$  under controlled sensitivity level  $\rho_0$  at the covariate selection  $\mathbf{z} = (0.25, 0.25)^T$  and  $\mathbf{z} = (0.25, 0.75)^T$  by our proposed method and an existing Bayesian method (Inácio de Carvalho et al. 2013) are estimated and presented. Results were summarized over 100 Monte Carlo iterations.

| $n_1 = n_0$     | $\mathbf{z} = (0.25, 0.25)^T$ |      |      |                    |      |      | $\mathbf{z} = (0.25, 0.75)^T$ |      |      |                    |      |      |
|-----------------|-------------------------------|------|------|--------------------|------|------|-------------------------------|------|------|--------------------|------|------|
|                 | Proposal                      |      |      | Inácio de Carvalho |      |      | Proposal                      |      |      | Inácio de Carvalho |      |      |
|                 | Bias (SD)                     | SE   | Cov  | Bias (SD)          | SE   | Cov  | Bias (SD)                     | SE   | Cov  | Bias (SD)          | SE   | Cov  |
| $\rho_0 = 0.95$ |                               |      |      |                    |      |      |                               |      |      |                    |      |      |
| 100             | 332(678)                      | 871  | 0.9  | 244(391)           | 428  | 0.98 | 159(1765)                     | 1914 | 0.94 | 311(1111)          | 1199 | 1    |
| 200             | 160(387)                      | 485  | 0.89 | 128(251)           | 267  | 0.98 | 98(1454)                      | 1335 | 0.92 | 264(816)           | 893  | 0.98 |
| 500             | 134(289)                      | 282  | 0.89 | 72(140)            | 160  | 0.98 | 80(781)                       | 851  | 0.98 | 193(523)           | 570  | 0.96 |
| 1000            | 101(166)                      | 171  | 0.9  | 45(114)            | 107  | 0.94 | -42(564)                      | 600  | 0.97 | 40(370)            | 386  | 0.99 |
| 5000            | 55(66)                        | 67   | 0.82 | 13(47)             | 47   | 0.97 | -60(282)                      | 259  | 0.92 | 26(180)            | 185  | 0.97 |
| $\rho_0 = 0.90$ |                               |      |      |                    |      |      |                               |      |      |                    |      |      |
| 100             | 313(1225)                     | 1353 | 0.91 | 294(789)           | 850  | 0.97 | -67(2164)                     | 2194 | 1    | 67(1426)           | 1556 | 0.99 |
| 200             | 113(826)                      | 876  | 0.94 | 168(574)           | 603  | 0.99 | -56(1644)                     | 1609 | 0.96 | 153(1068)          | 1143 | 0.97 |
| 500             | 174(523)                      | 549  | 0.94 | 134(367)           | 390  | 0.98 | 176(1136)                     | 1115 | 0.96 | 201(698)           | 736  | 0.95 |
| 1000            | 120(374)                      | 378  | 0.94 | 81(289)            | 271  | 0.93 | -17(702)                      | 760  | 0.97 | 13(502)            | 519  | 0.98 |
| 5000            | 59(176)                       | 160  | 0.88 | 24(127)            | 125  | 0.95 | -24(347)                      | 331  | 0.92 | 31(243)            | 245  | 0.94 |
| $\rho_0 = 0.85$ |                               |      |      |                    |      |      |                               |      |      |                    |      |      |
| 100             | 276(1584)                     | 1666 | 0.94 | 207(1071)          | 1169 | 0.96 | -61(2012)                     | 2047 | 1    | -132(1373)         | 1487 | 0.97 |
| 200             | 35(999)                       | 1208 | 0.98 | 131(811)           | 861  | 0.97 | -47(1405)                     | 1464 | 0.97 | 27(999)            | 1061 | 0.94 |
| 500             | 176(760)                      | 753  | 0.94 | 155(541)           | 561  | 0.98 | 308(947)                      | 925  | 0.91 | 151(655)           | 673  | 0.96 |
| 1000            | 97(597)                       | 526  | 0.89 | 90(416)            | 397  | 0.92 | 41(611)                       | 661  | 0.96 | -12(468)           | 486  | 0.98 |
| 5000            | 7(247)                        | 231  | 0.93 | 26(189)            | 183  | 0.96 | 25(307)                       | 298  | 0.94 | 25(222)            | 226  | 0.93 |
| $\rho_0 = 0.80$ |                               |      |      |                    |      |      |                               |      |      |                    |      |      |
| 100             | -47(1805)                     | 1864 | 0.97 | 69(1210)           | 1350 | 0.96 | 59(1514)                      | 1686 | 0.98 | -240(1165)         | 1253 | 0.98 |
| 200             | -100(1232)                    | 1394 | 0.99 | 63(934)            | 998  | 0.96 | -81(1131)                     | 1185 | 0.97 | -57(825)           | 867  | 0.94 |
| 500             | 92(890)                       | 880  | 0.97 | 144(629)           | 647  | 0.98 | 215(705)                      | 687  | 0.95 | 94(534)            | 540  | 0.98 |
| 1000            | 43(712)                       | 619  | 0.9  | 81(478)            | 463  | 0.92 | 6(498)                        | 521  | 0.96 | -26(376)           | 396  | 0.99 |
| 5000            | -38(286)                      | 274  | 0.93 | 23(220)            | 214  | 0.98 | 64(222)                       | 231  | 0.95 | 17(176)            | 182  | 0.94 |

Bias,  $(\hat{\phi} - \phi_0) \times 10^4$ ; SD, standard deviation  $\times 10^4$ ; SE, standard error estimated using bootstrap-based variance estimation  $\times 10^4$ ; Cov (%), coverage rates of 95% confidence interval; Inácio de Carvalho: the method by Inácio de Carvalho et al. (2013).

Table S10: Estimation and inference results under the first simulation setting. Specificity  $\phi_0(\mathbf{z})$  under controlled sensitivity level  $\rho_0$  at the covariate selection  $\mathbf{z} = (0.75, 0.25)^T$  and  $\mathbf{z} = (0.75, 0.75)^T$  by our proposed method and an existing Bayesian method (Inácio de Carvalho et al. 2013) are estimated and presented. Results were summarized over 100 Monte Carlo iterations.

| $n_1 = n_0$     | $\mathbf{z} = (0.75, 0.25)^T$ |      |      |                    |      |      | $\mathbf{z} = (0.75, 0.75)^T$ |      |      |                    |      |      |
|-----------------|-------------------------------|------|------|--------------------|------|------|-------------------------------|------|------|--------------------|------|------|
|                 | Proposal                      |      |      | Inácio de Carvalho |      |      | Proposal                      |      |      | Inácio de Carvalho |      |      |
|                 | Bias (SD)                     | SE   | Cov  | Bias (SD)          | SE   | Cov  | Bias (SD)                     | SE   | Cov  | Bias (SD)          | SE   | Cov  |
| $\rho_0 = 0.95$ |                               |      |      |                    |      |      |                               |      |      |                    |      |      |
| 100             | 477(1341)                     | 1419 | 0.96 | -69(2408)          | 2186 | 0.93 | 288(640)                      | 759  | 0.99 | -3(1383)           | 1573 | 0.99 |
| 200             | 170(749)                      | 926  | 0.98 | -108(1549)         | 1810 | 0.97 | 176(397)                      | 535  | 1    | 197(894)           | 1216 | 0.99 |
| 500             | 111(523)                      | 511  | 0.94 | 24(1229)           | 1158 | 0.92 | 82(294)                       | 318  | 0.97 | 110(734)           | 757  | 0.97 |
| 1000            | 68(336)                       | 347  | 0.96 | -92(783)           | 819  | 0.96 | 61(207)                       | 225  | 0.95 | 6(468)             | 537  | 0.98 |
| 5000            | -4(142)                       | 142  | 0.95 | 0(353)             | 373  | 0.97 | 15(86)                        | 104  | 1    | 19(194)            | 254  | 0.99 |
| $\rho_0 = 0.90$ |                               |      |      |                    |      |      |                               |      |      |                    |      |      |
| 100             | 328(1682)                     | 1772 | 0.98 | -99(1943)          | 2068 | 0.98 | 197(1125)                     | 1244 | 0.98 | -299(1390)         | 1610 | 0.99 |
| 200             | 178(1171)                     | 1369 | 0.97 | 192(1402)          | 1609 | 1    | 177(731)                      | 944  | 1    | 82(880)            | 1125 | 0.98 |
| 500             | 38(826)                       | 838  | 0.96 | 42(1031)           | 1053 | 0.96 | 79(574)                       | 584  | 0.95 | 48(706)            | 715  | 0.94 |
| 1000            | 11(536)                       | 588  | 0.96 | -19(648)           | 725  | 0.97 | 80(393)                       | 419  | 0.97 | -19(441)           | 514  | 0.98 |
| 5000            | -39(242)                      | 255  | 0.94 | 32(287)            | 325  | 0.98 | 20(166)                       | 196  | 0.99 | 10(192)            | 239  | 0.99 |
| $\rho_0 = 0.85$ |                               |      |      |                    |      |      |                               |      |      |                    |      |      |
| 100             | 175(2007)                     | 1905 | 0.98 | -269(1605)         | 1661 | 0.94 | -4(1346)                      | 1430 | 0.97 | -369(1100)         | 1278 | 0.98 |
| 200             | 188(1306)                     | 1498 | 0.98 | 73(902)            | 1152 | 0.98 | 111(862)                      | 1089 | 0.97 | -5(674)            | 829  | 0.97 |
| 500             | 38(992)                       | 952  | 0.93 | 78(679)            | 714  | 0.96 | 38(687)                       | 685  | 0.95 | 5(522)             | 529  | 0.95 |
| 1000            | 44(644)                       | 680  | 0.96 | -26(463)           | 513  | 0.96 | 67(458)                       | 491  | 0.96 | -30(324)           | 381  | 0.98 |
| 5000            | -17(287)                      | 302  | 0.97 | -6(194)            | 224  | 0.97 | 15(195)                       | 230  | 1    | 2(145)             | 176  | 0.99 |
| $\rho_0 = 0.80$ |                               |      |      |                    |      |      |                               |      |      |                    |      |      |
| 100             | -195(1903)                    | 1871 | 0.94 | -233(1254)         | 1271 | 0.95 | -186(1366)                    | 1414 | 0.98 | -343(795)          | 927  | 0.99 |
| 200             | 148(1215)                     | 1413 | 0.96 | -12(585)           | 793  | 0.98 | 34(854)                       | 1055 | 0.98 | -51(473)           | 569  | 0.97 |
| 500             | -30(883)                      | 927  | 0.97 | -30(484)           | 469  | 0.94 | -4(681)                       | 669  | 0.96 | -17(351)           | 359  | 0.94 |
| 1000            | 143(588)                      | 656  | 0.98 | -47(304)           | 335  | 0.96 | 46(440)                       | 478  | 0.97 | -32(220)           | 259  | 0.96 |
| 5000            | -11(282)                      | 293  | 0.96 | -47(128)           | 147  | 0.97 | 7(191)                        | 223  | 0.99 | -1(100)            | 119  | 0.99 |

Bias,  $(\hat{\phi} - \phi_0) \times 10^4$ ; SD, standard deviation  $\times 10^4$ ; SE, standard error estimated using bootstrap-based variance estimation  $\times 10^4$ ; Cov (%), coverage rates of 95% confidence interval; Inácio de Carvalho: the method by Inácio de Carvalho et al. (2013).

Table S11: Evaluation of the proposed method with monotonicity restoration under the first and second simulation setting. Specificity  $\phi_0(\mathbf{z})$  under controlled sensitivity level  $\rho_0$  at the covariate selection  $\mathbf{z} = (0.50, 0.50)^T$  by our proposed method with monotonization are estimated and presented. Results were summarized over 5000 Monte Carlo iterations.

| $n_1 = n_0$     | Setting 1 |      |      |      | Setting 2 |      |      |      |
|-----------------|-----------|------|------|------|-----------|------|------|------|
|                 | Bias      | SD   | SE   | Cov  | Bias      | SD   | SE   | Cov  |
| $\rho_0 = 0.95$ |           |      |      |      |           |      |      |      |
| 100             | 291       | 1055 | 1129 | 95.0 | 219       | 1039 | 1067 | 93.9 |
| 200             | 142       | 706  | 779  | 96.1 | 119       | 665  | 733  | 95.1 |
| 500             | 48        | 434  | 470  | 95.8 | 7         | 404  | 432  | 96.3 |
| 1000            | 35        | 305  | 323  | 95.1 | -28       | 283  | 297  | 95.9 |
| 5000            | 5         | 136  | 139  | 95.1 | -48       | 125  | 128  | 93.8 |
| $\rho_0 = 0.90$ |           |      |      |      |           |      |      |      |
| 100             | 226       | 1073 | 1185 | 97.0 | 212       | 1374 | 1494 | 97.3 |
| 200             | 121       | 748  | 807  | 95.8 | 105       | 954  | 1041 | 96.8 |
| 500             | 41        | 457  | 492  | 95.9 | -14       | 623  | 641  | 95.4 |
| 1000            | 30        | 329  | 343  | 95.0 | -41       | 432  | 448  | 95.1 |
| 5000            | 4         | 147  | 150  | 95.1 | -57       | 193  | 196  | 94.4 |
| $\rho_0 = 0.85$ |           |      |      |      |           |      |      |      |
| 100             | 167       | 1018 | 1113 | 97.6 | 188       | 1375 | 1515 | 98.0 |
| 200             | 91        | 707  | 766  | 96.8 | 111       | 966  | 1048 | 96.8 |
| 500             | 33        | 440  | 473  | 96.0 | 35        | 623  | 651  | 95.4 |
| 1000            | 25        | 320  | 328  | 94.6 | 23        | 440  | 454  | 95.3 |
| 5000            | 1         | 142  | 144  | 94.6 | 10        | 195  | 199  | 95.1 |
| $\rho_0 = 0.80$ |           |      |      |      |           |      |      |      |
| 100             | 119       | 911  | 995  | 97.6 | 146       | 1176 | 1330 | 98.3 |
| 200             | 72        | 642  | 686  | 96.6 | 124       | 835  | 912  | 97.1 |
| 500             | 22        | 398  | 424  | 96.1 | 75        | 537  | 562  | 95.5 |
| 1000            | 18        | 286  | 296  | 95.1 | 71        | 380  | 392  | 95.0 |
| 5000            | -1        | 128  | 130  | 94.9 | -1        | 128  | 130  | 94.9 |

Bias,  $(\hat{\phi} - \phi_0) \times 10^4$ ; SD, standard deviation  $\times 10^4$ ; SE, standard error estimated using bootstrap-based variance estimation  $\times 10^4$ ; Cov (%), coverage rates of 95% confidence interval.

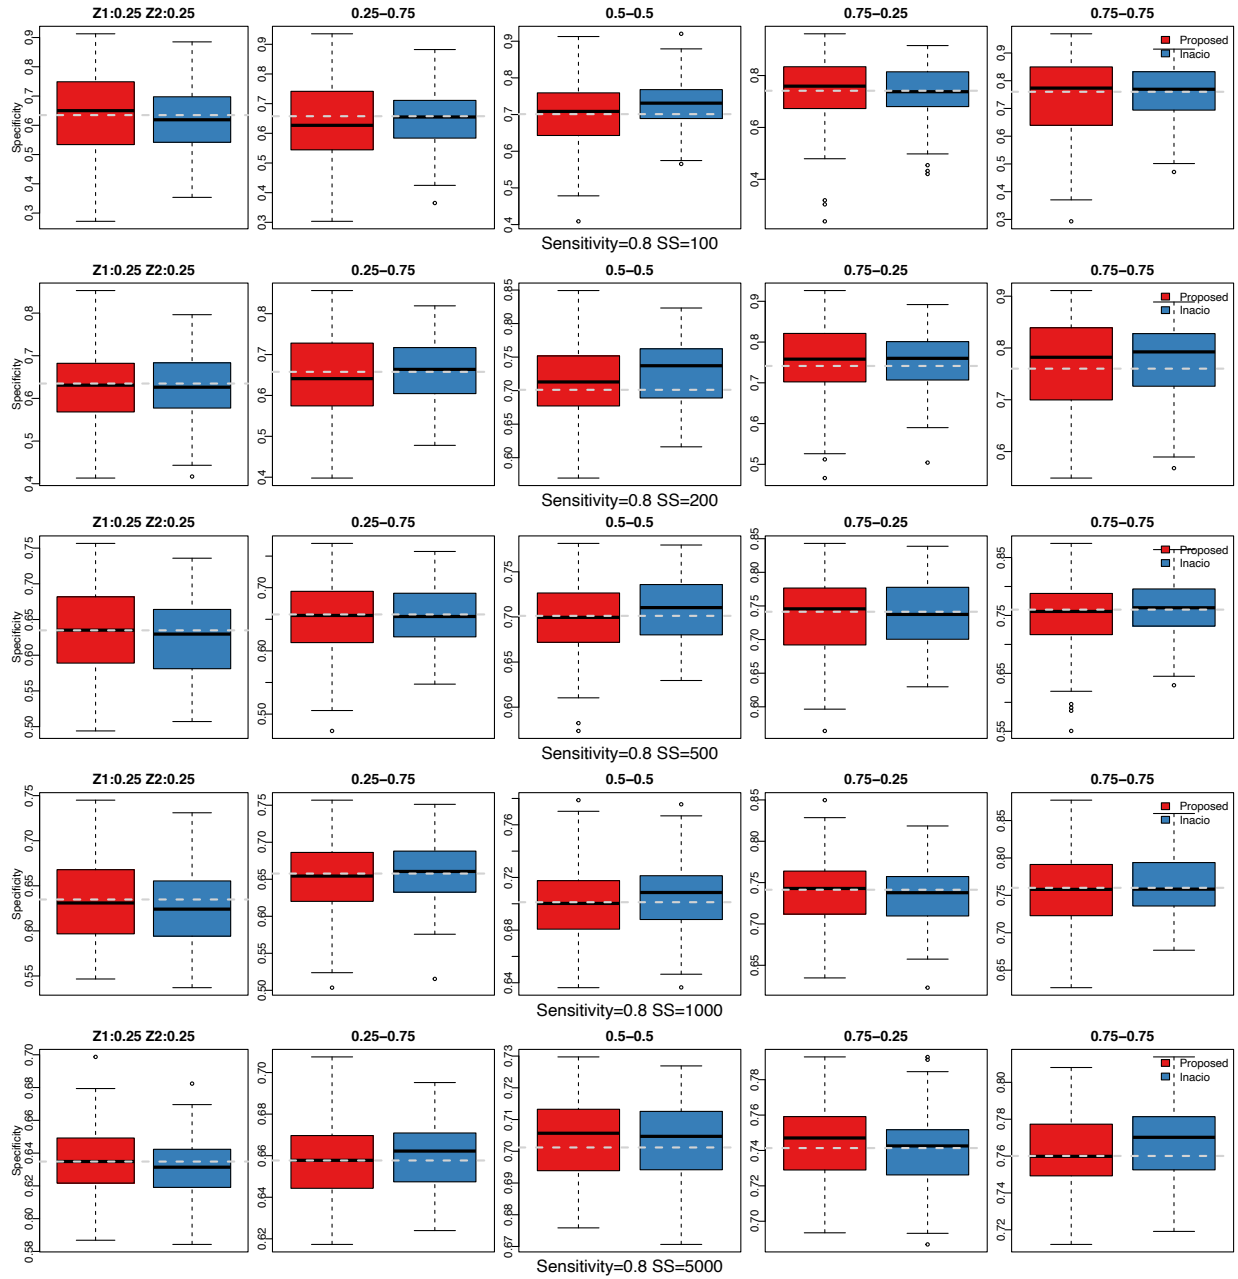

Figure S1: Simulation results in the first simulation setting of the proposed method (red box), the Inácio de Carvalho et al. (2013) (blue), and true value (black). From top panel to the bottom panel, the sample sizes are 100, 200, 500, 1000, and 5000. The Sensitivity level is fixed at 0.8. The title of each figure shows the covariate combination for  $Z_1$  and  $Z_2$ . All results are summarized over 100 Monte Carlo datasets.

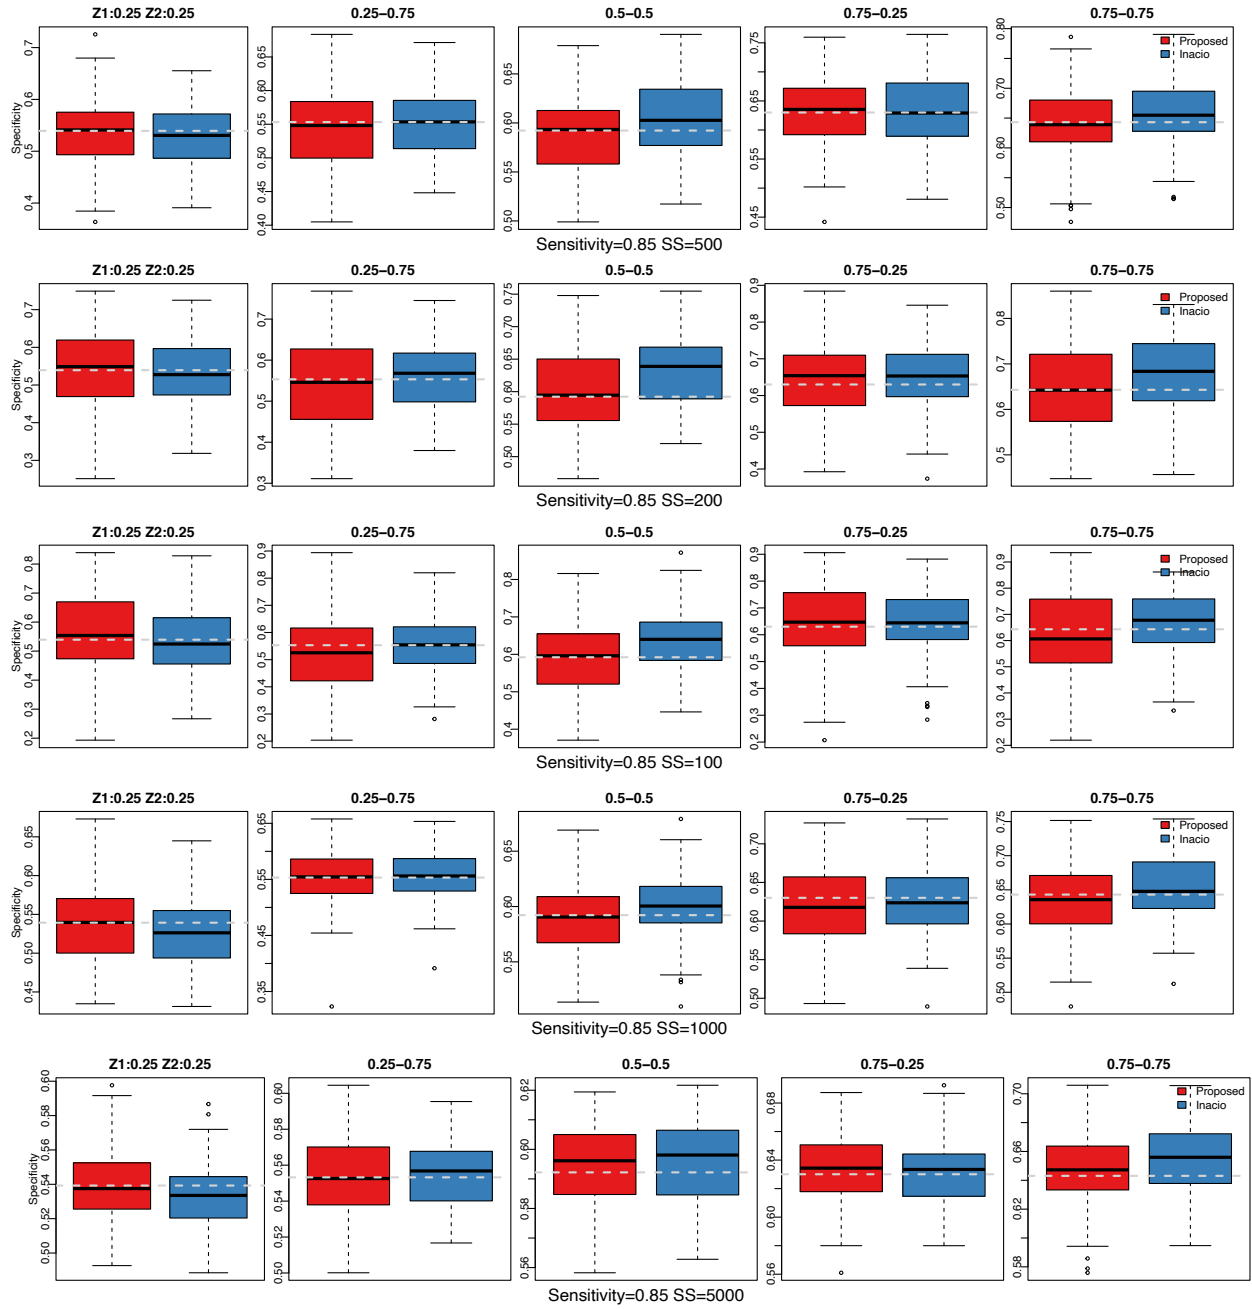

Figure S2: Simulation results in the first simulation setting of the proposed method (red box), the Inácio de Carvalho et al. (2013) (blue), and true value (black). From top panel to the bottom panel, the sample sizes are 100, 200, 500, 1000, and 5000. The Sensitivity level is fixed at 0.85. The title of each figure shows the covariate combination for  $Z_1$  and  $Z_2$ . All results are summarized over 100 Monte Carlo datasets.

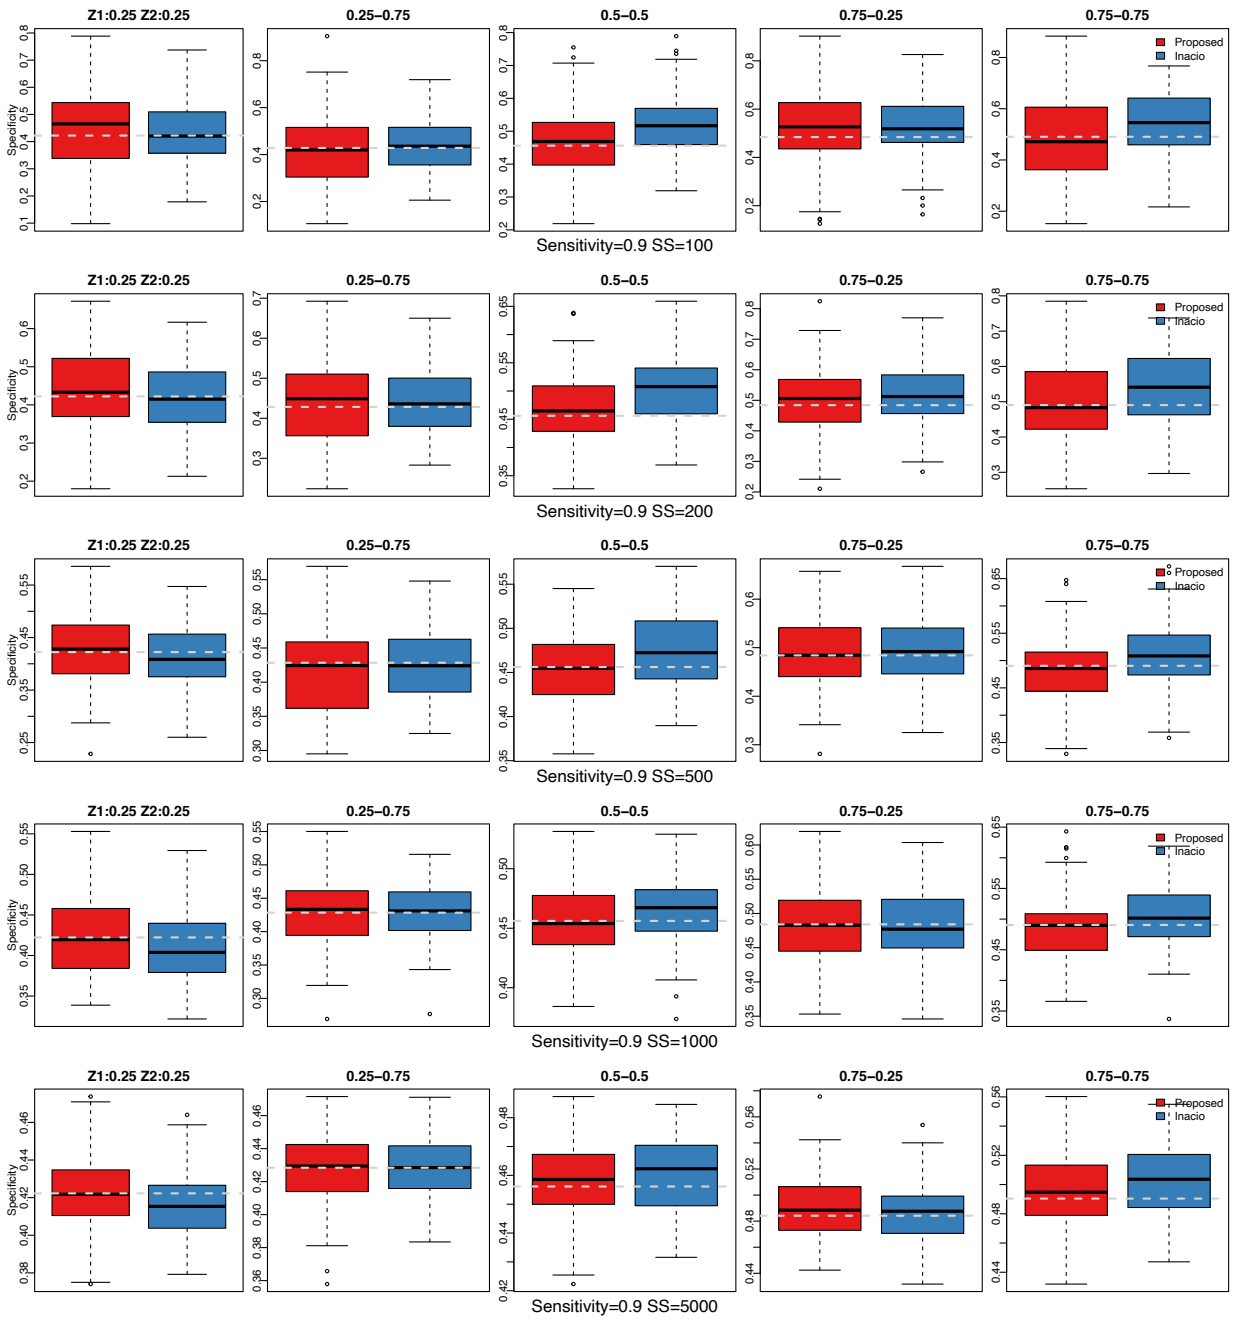

Figure S3: Simulation results in the first simulation setting of the proposed method (red box), the Inácio de Carvalho et al. (2013) (blue), and true value (black). From top panel to the bottom panel, the sample sizes are 100, 200, 500, 1000, and 5000. The Sensitivity level is fixed at 0.90. The title of each figure shows the covariate combination for  $Z_1$  and  $Z_2$ . All results are summarized over 100 Monte Carlo datasets.

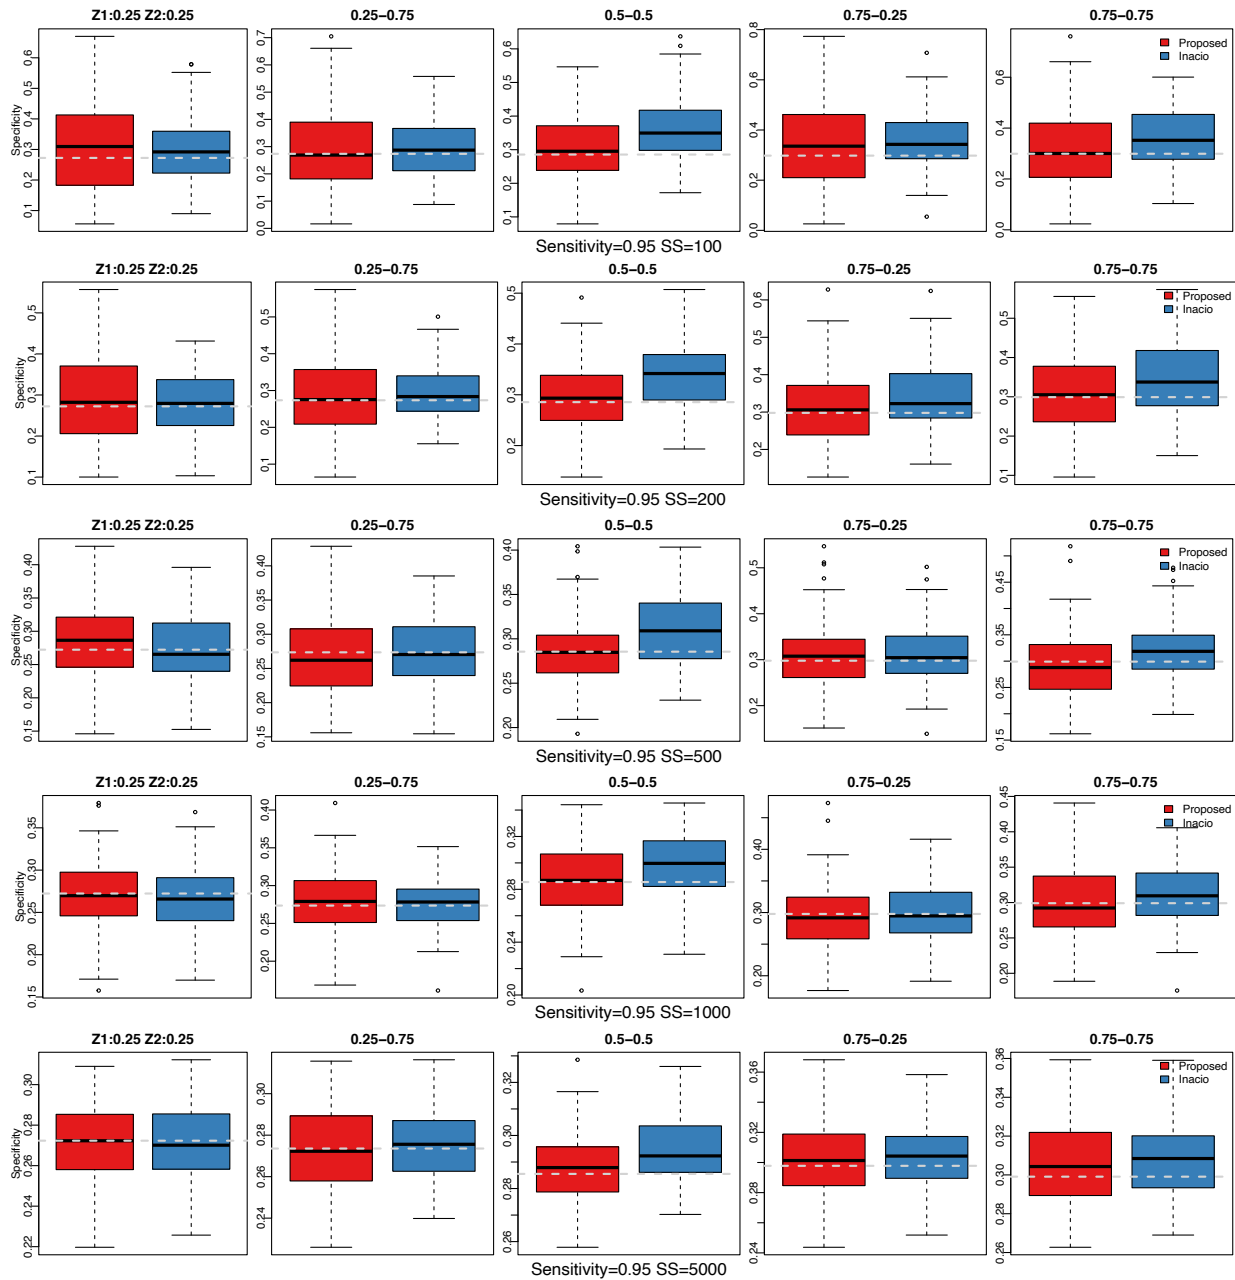

Figure S4: Simulation results in the first simulation setting of the proposed method (red box), the Inácio de Carvalho et al. (2013) (blue), and true value (black). From top panel to the bottom panel, the sample sizes are 100, 200, 500, 1000, and 5000. The Sensitivity level is fixed at 0.95. The title of each figure shows the covariate combination for  $Z_1$  and  $Z_2$ . All results are summarized over 100 Monte Carlo datasets.



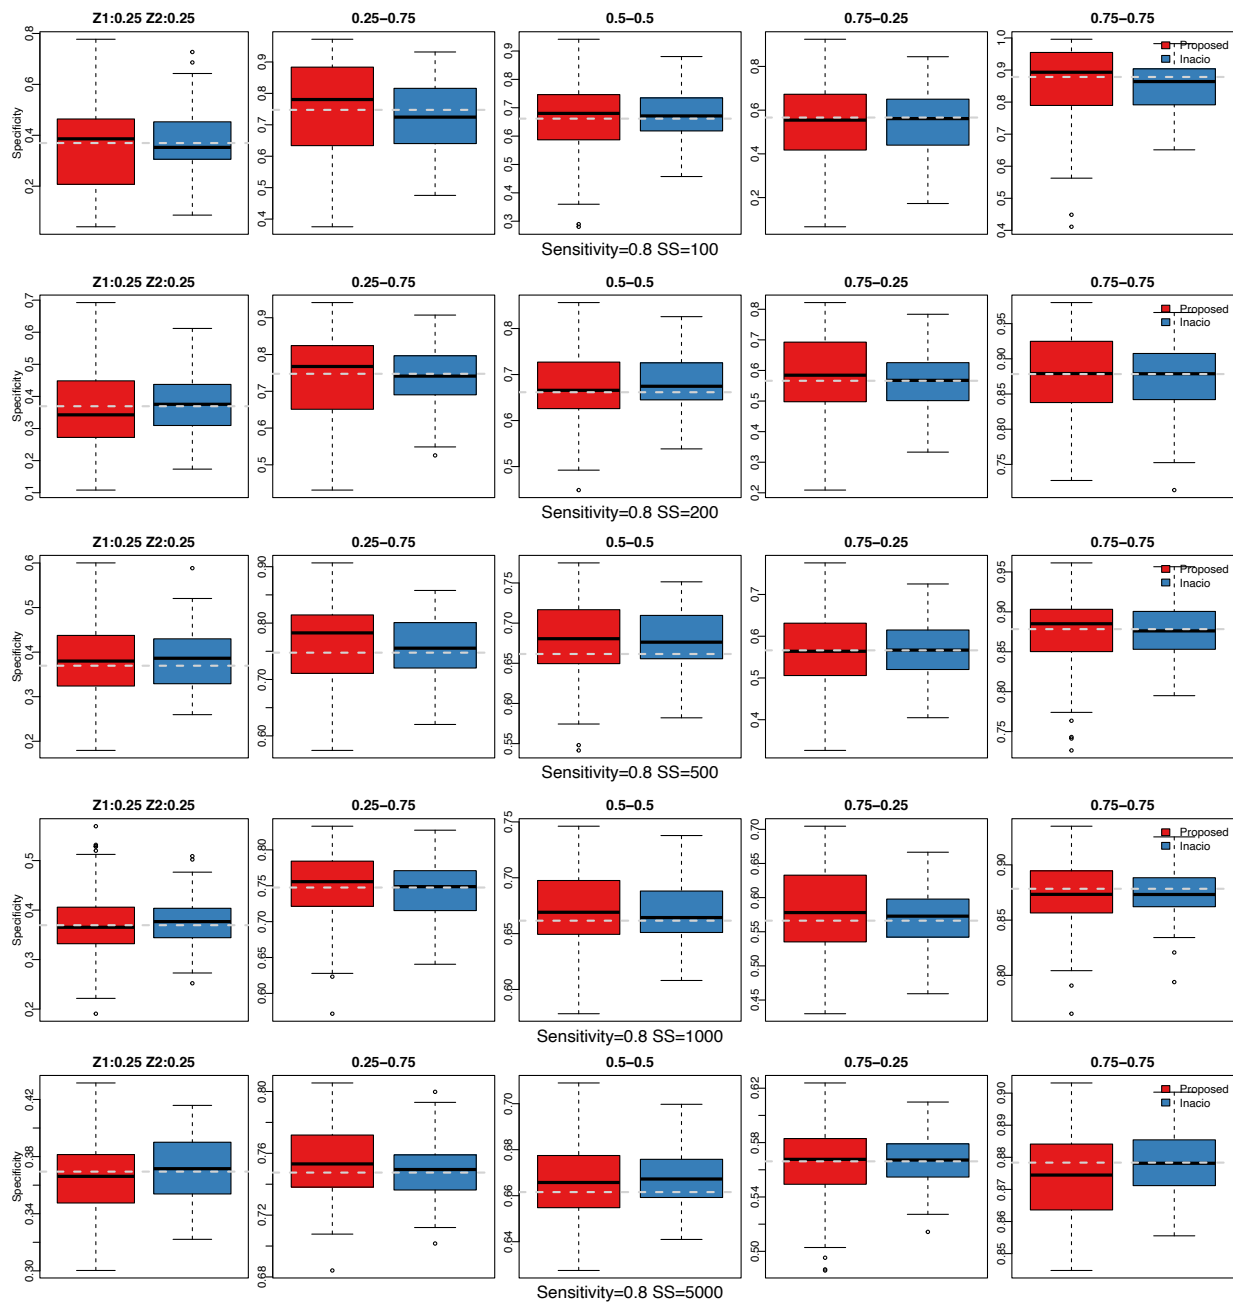

Figure S5: Simulation results in the second simulation setting of the proposed method (red box), the Inácio de Carvalho et al. (2013) (blue), and true value (black). From top panel to the bottom panel, the sample sizes are 100, 200, 500, 1000, and 5000. The Sensitivity level is fixed at 0.80. The title of each figure shows the covariate combination for  $Z_1$  and  $Z_2$ . All results are summarized over 100 Monte Carlo datasets.

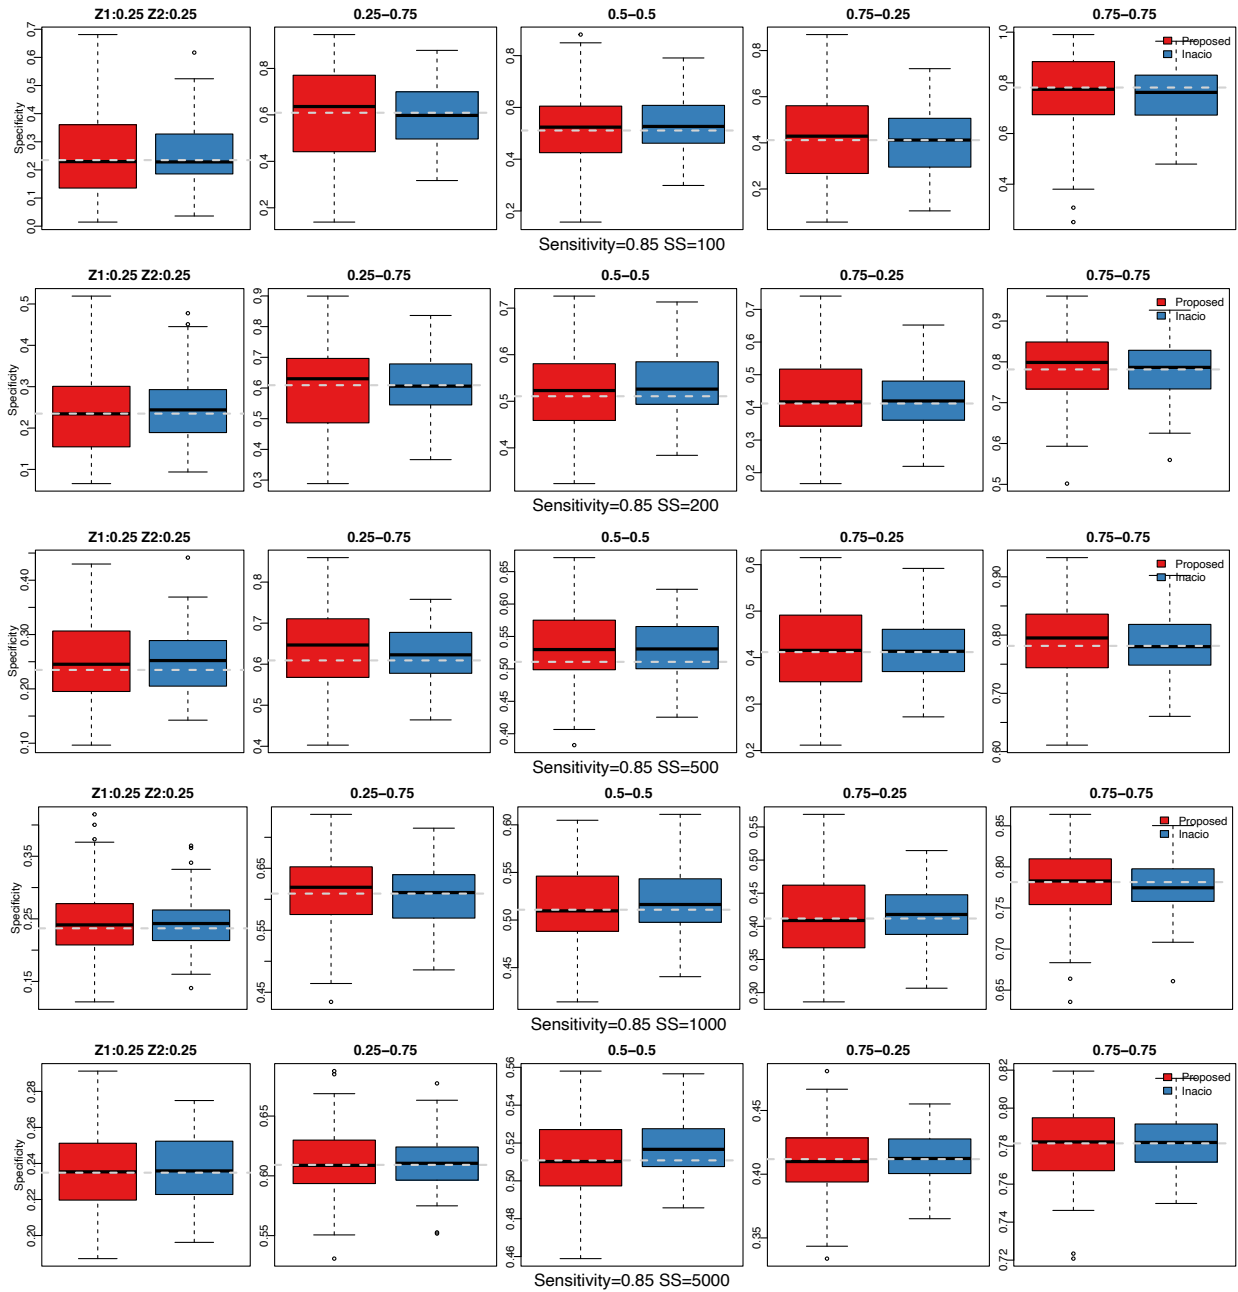

Figure S6: Simulation results in the second simulation setting of the proposed method (red box), the Inácio de Carvalho et al. (2013) (blue), and true value (black). From top panel to the bottom panel, the sample sizes are 100, 200, 500, 1000, and 5000. The Sensitivity level is fixed at 0.85. The title of each figure shows the covariate combination for  $Z_1$  and  $Z_2$ . All results are summarized over 100 Monte Carlo datasets.

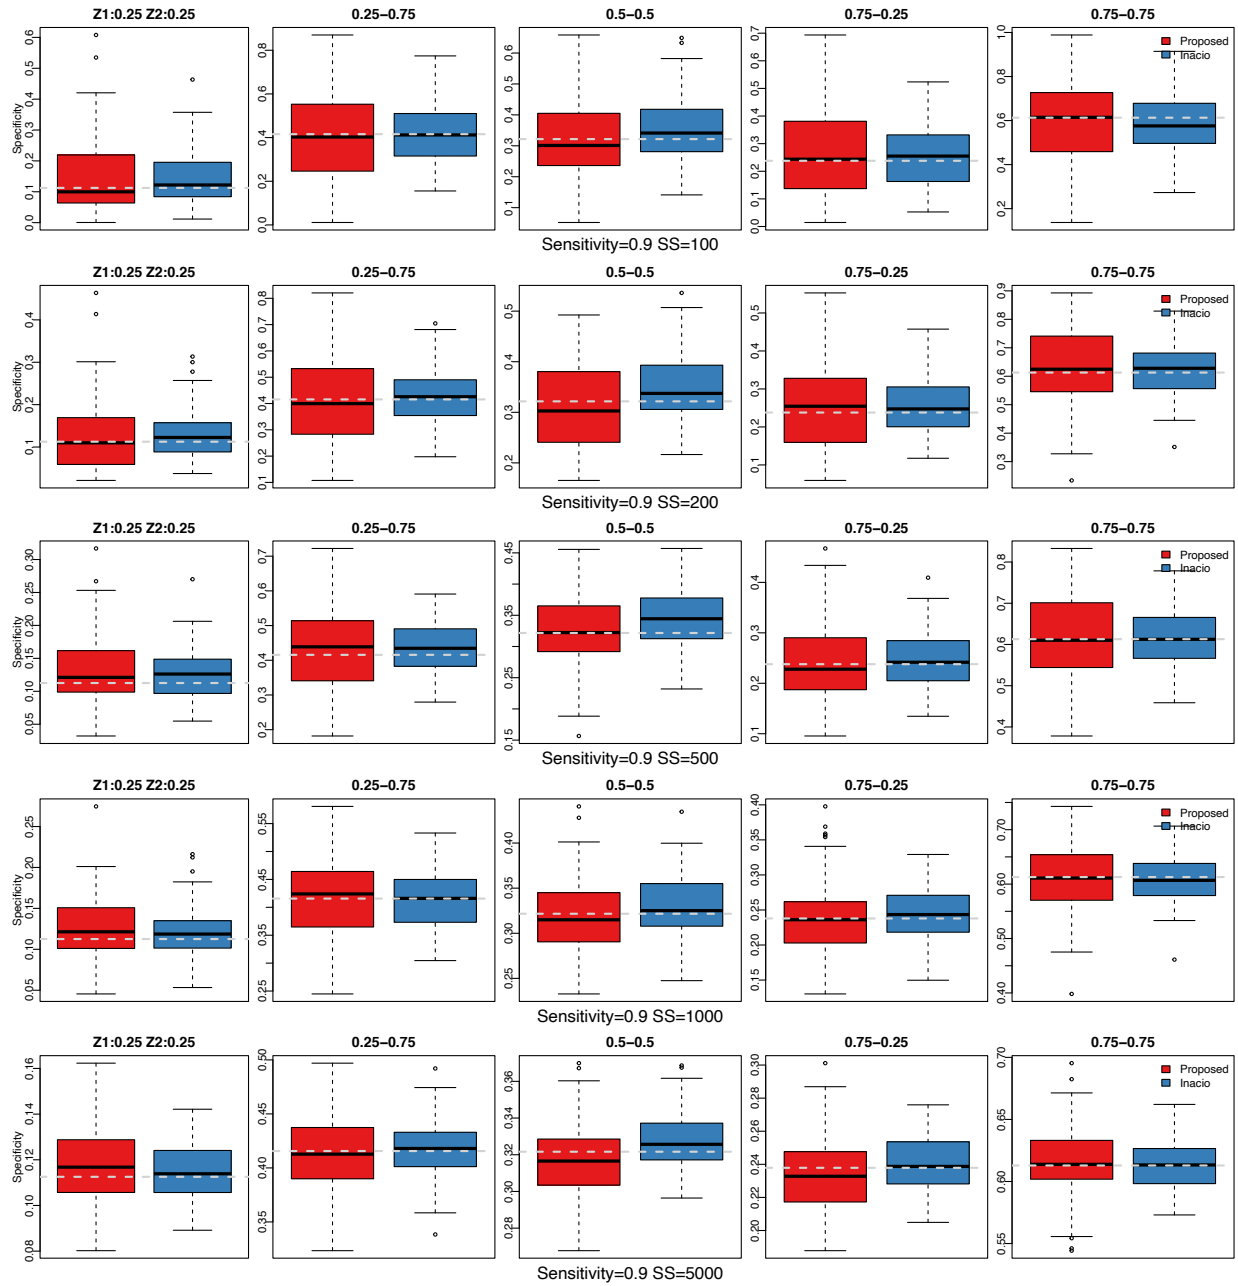

Figure S7: Simulation results in the second simulation setting of the proposed method (red box), the Inácio de Carvalho et al. (2013) (blue), and true value (black). From top panel to the bottom panel, the sample sizes are 100, 200, 500, 1000, and 5000. The Sensitivity level is fixed at 0.90. The title of each figure shows the covariate combination for  $Z_1$  and  $Z_2$ . All results are summarized over 100 Monte Carlo datasets.

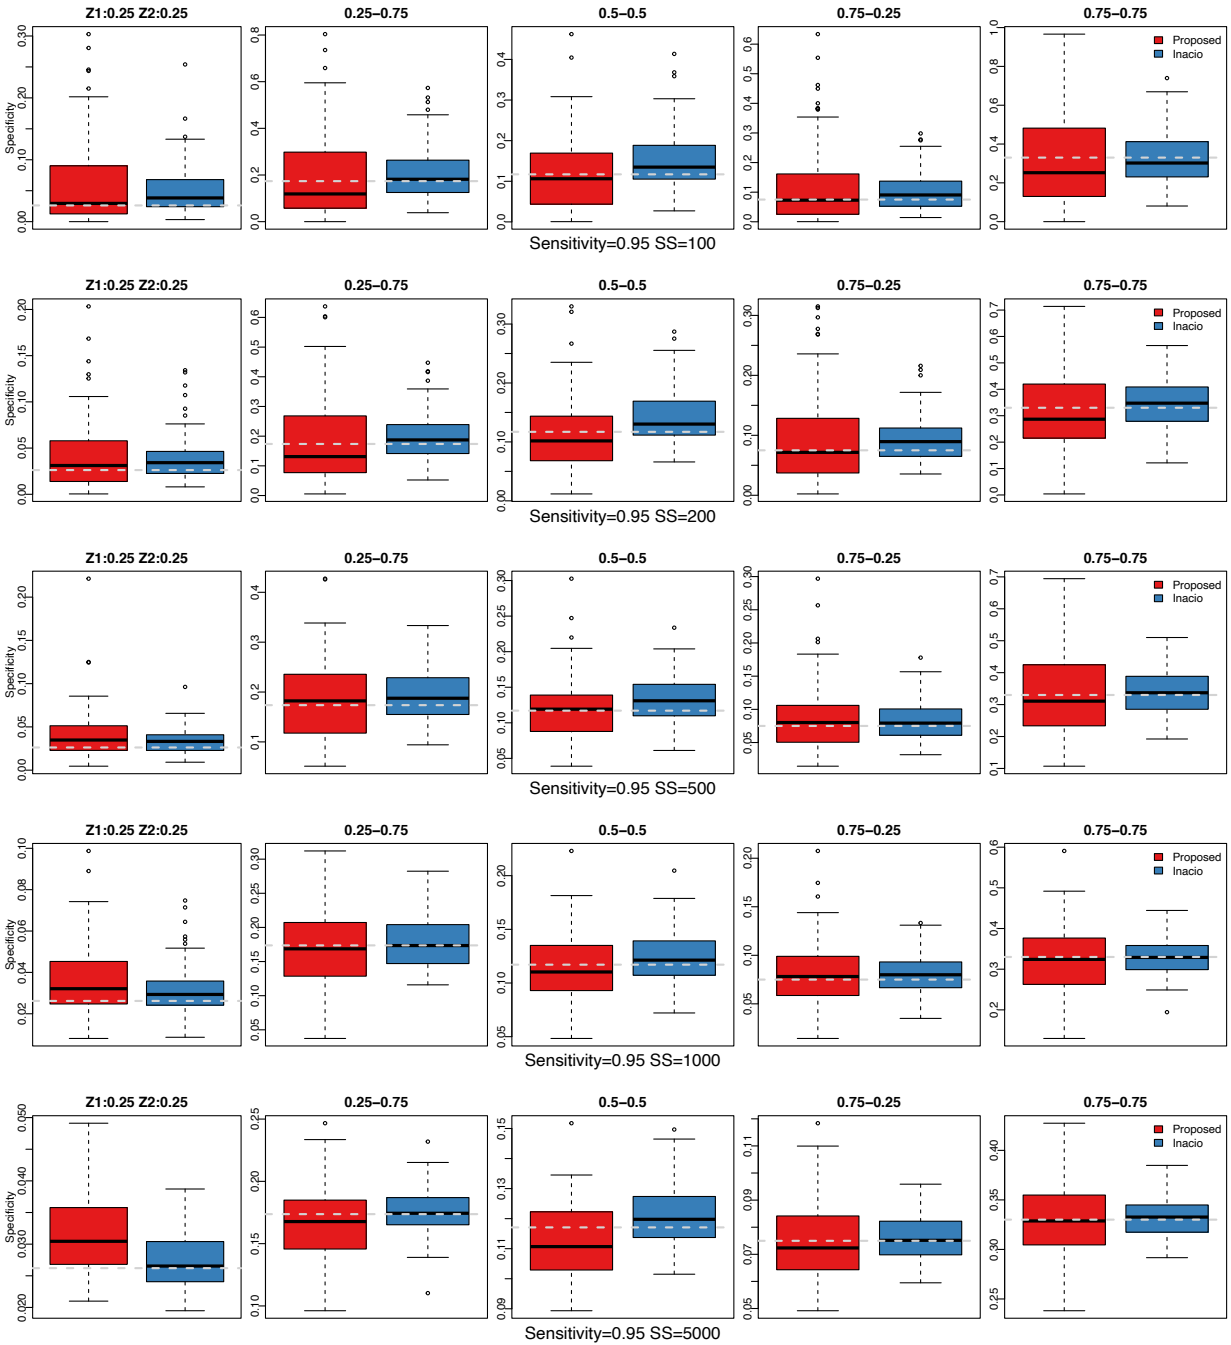

Figure S8: Simulation results in the second simulation setting of the proposed method (red box), the Inácio de Carvalho et al. (2013) (blue), and true value (black). From top panel to the bottom panel, the sample sizes are 100, 200, 500, 1000, and 5000. The Sensitivity level is fixed at 0.95. The title of each figure shows the covariate combination for  $Z_1$  and  $Z_2$ . All results are summarized over 100 Monte Carlo datasets.
